# Supplementary material
Source: MDPI journal article supplement (https://www.mdpi.com/1424-2818/15/8/918)

# Outlines of the spermathecal receptacle of the subgenus *Chaetocnema*

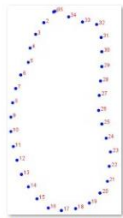

Chaetocnema baoshanica.jpg

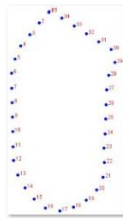

Chaetocnema basalis.jpg

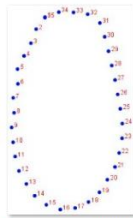

Chaetocnema breviscula.jpg

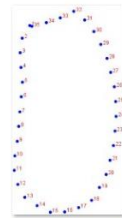

Chaetocnema chenii.jpg

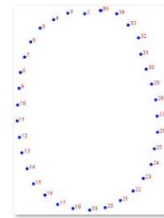

Chaetocnema chlorophana.jpg

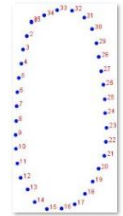

Chaetocnema compressa.jpg

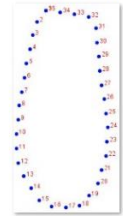

Chaetocnema condinna.jpg

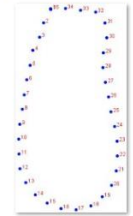

Chaetocnema conducta.jpg

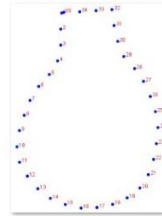

Chaetocnema confinis.jpg

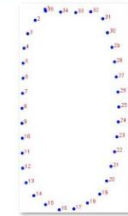

Chaetocnema constricta.jpg

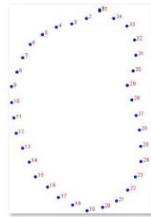

Chaetocnema coyei.jpg

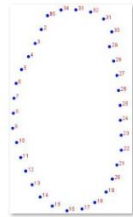

Chaetocnema delarouzei.jpg

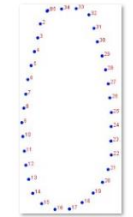

Chaetocnema depressa.jpg

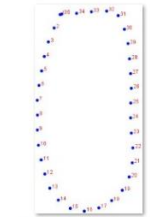

Chaetocnema deqinensis.jpg

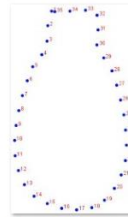

Chaetocnema dipitana.jpg

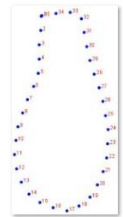

Chaetocnema duvivieri.jpg

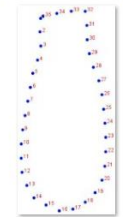

Chaetocnema excavata.jpg

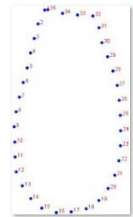

Chaetocnema forticostata.jpg

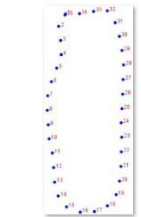

Chaetocnema fusiformis.jpg

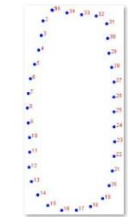

Chaetocnema gracilis.jpg

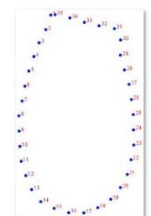

Chaetocnema granulicollis.jpg

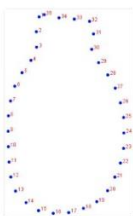

Chaetocnema hainanensis.jpg

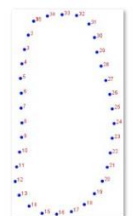

Chaetocnema heptapotamica.jpg

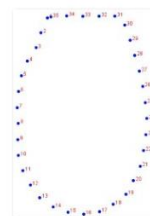

Chaetocnema jinxuensis.jpg

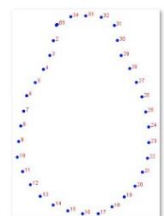

Chaetocnema kanmialai.jpg

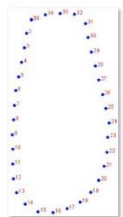

Chaetocnema kimotoi.jpg

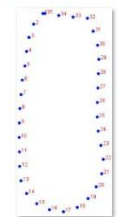

Chaetocnema kingpinensis.jpg

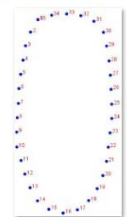

Chaetocnema koreana.jpg

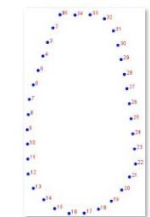

Chaetocnema lubischevi.jpg

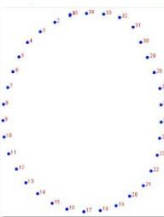

Chaetocnema major.jpg

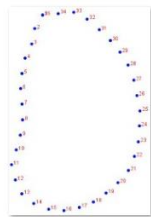

Chaetocnema mandschurica.jpg

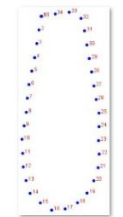

Chaetocnema nebulosa.jpg

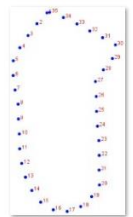

Chaetocnema nigrica.jpg

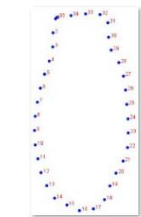

Chaetocnema nigrilatus.jpg

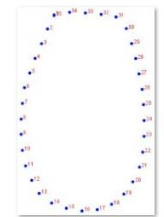

Chaetocnema orientalis.jpg

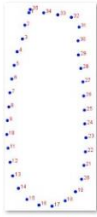

Chaetocnema parafusiformis.jpg

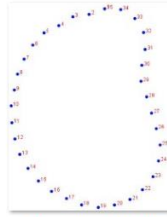

Chaetocnema pelagica.jpg

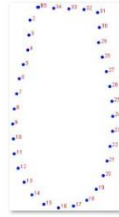

Chaetocnema pericampyla.jpg

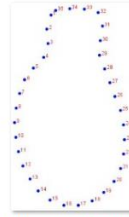

Chaetocnema philippina.jpg

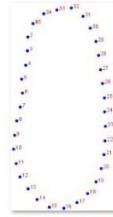

Chaetocnema picipes.jpg

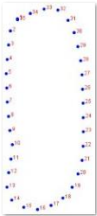

Chaetocnema puncticollis.jpg

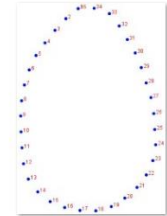

Chaetocnema punctifrons.jpg

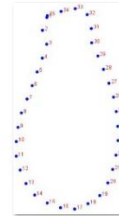

Chaetocnema purpurea n.sp.jpg

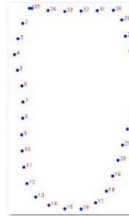

Chaetocnema resplendens.jpg

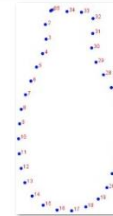

Chaetocnema sabahensis.jpg

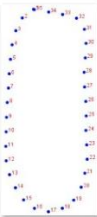

Chaetocnema salixis.jpg

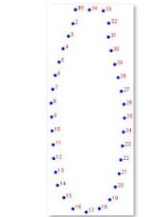

Chaetocnema schefferi.jpg

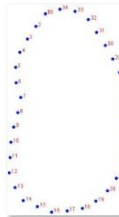

Chaetocnema schlaeflii.jpg

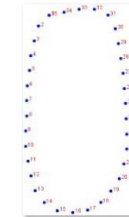

Chaetocnema semicoerulea.jpg

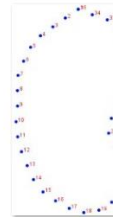

Chaetocnema shabalinii.jpg

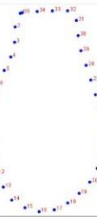

Chaetocnema simplicifrons.jpg

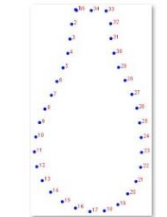

Chaetocnema sticta.jpg

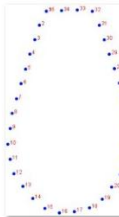

Chaetocnema tibialis.jpg

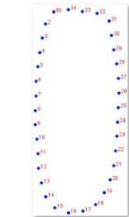

Chaetocnema transbaicalica.jpg

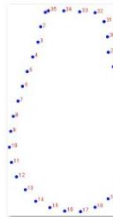

Chaetocnema tristis.jpg

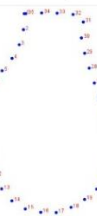

Chaetocnema wallacei.jpg

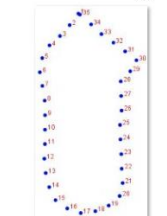

Chaetocnema warchalowskii.jpg

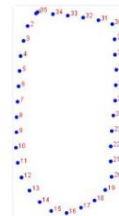

Chaetocnema yaosanica.jpg

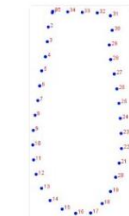

Chaetocnema yiei.jpg

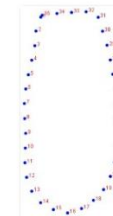

Chaetocnema yulongensis.jpg

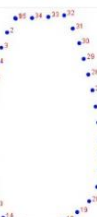

Chaetocnema yunnanica.jpg

## Outlines of the spermathecal receptacle of the subgenus *Udorpes*

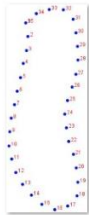

Chaetocnema aerosa.jpg

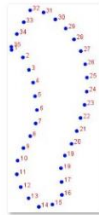

Chaetocnema afghana.jpg

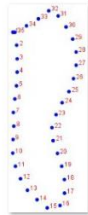

Chaetocnema angustifrons.jpg

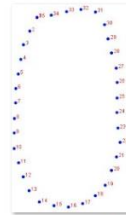

Chaetocnema angustula.jpg

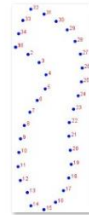

Chaetocnema arenacea.jpg

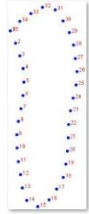

Chaetocnema arida.jpg

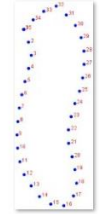

Chaetocnema aridula.jpg

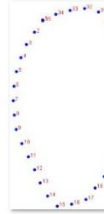

Chaetocnema balanomorpha.jpg

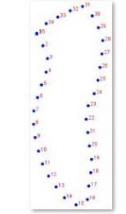

Chaetocnema belka.jpg

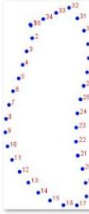

Chaetocnema bella1.jpg

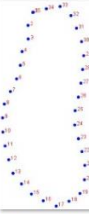

Chaetocnema bella2.jpg

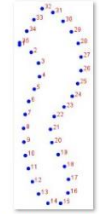

Chaetocnema bellij.jpg

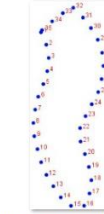

Chaetocnema bretinghami.jpg

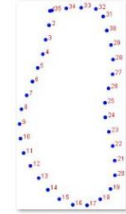

Chaetocnema cognata.jpg

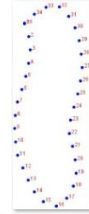

Chaetocnema concinnicollis1.jpg

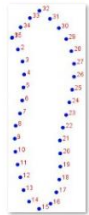

Chaetocnema concinnicollis2.jpg

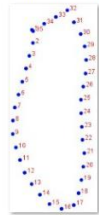

Chaetocnema concinnipennis.jpg

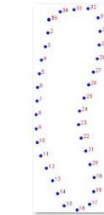

Chaetocnema confusa.jpg

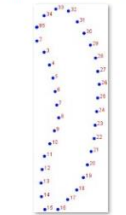

Chaetocnema costulata.jpg

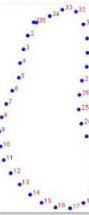

Chaetocnema cylindrica.jpg

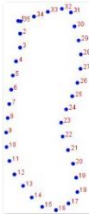

Chaetocnema eastafghanica.jpg

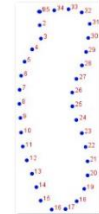

Chaetocnema glabra.jpg

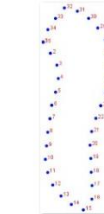

Chaetocnema gottwaldi.jpg

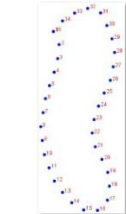

Chaetocnema grandis.jpg

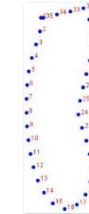

Chaetocnema greenica.jpg

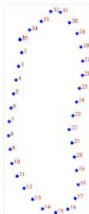

Chaetocnema hortensis.jpg

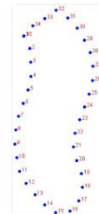

Chaetocnema igorij.jpg

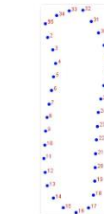

Chaetocnema imitatrix.jpg

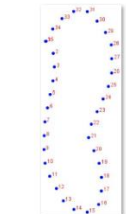

Chaetocnema ingenua1.jpg

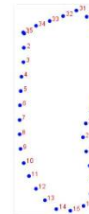

Chaetocnema ingenua2.jpg

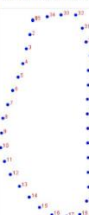

Chaetocnema klapperichi.jpg

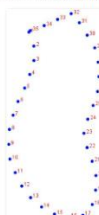

Chaetocnema kumaoensis.jpg

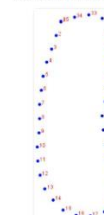

Chaetocnema leonhardi.jpg

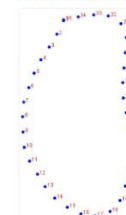

Chaetocnema ljudmilae.jpg

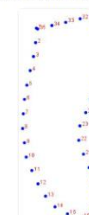

Chaetocnema malayana.jpg

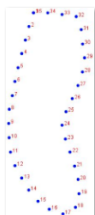

Chaetocnema mannerheimii.jpg

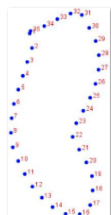

Chaetocnema merguiensis.jpg

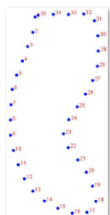

Chaetocnema midimpunctata.jpg

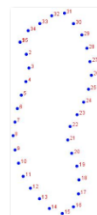

Chaetocnema modesta1.jpg

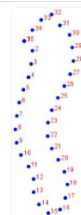

Chaetocnema modesta2.jpg

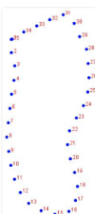

Chaetocnema modiglianii.jpg

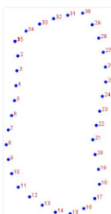

Chaetocnema montenegrina.jpg

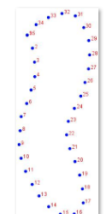

Chaetocnema nocticolor.jpg

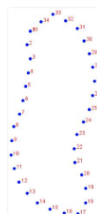

Chaetocnema obesa.jpg

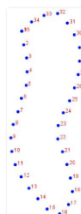

Chaetocnema oblonga.jpg

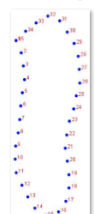

Chaetocnema paganettii.jpg

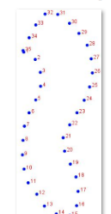

Chaetocnema paragreenica.jpg

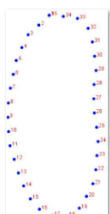

Chaetocnema procerula.jpg

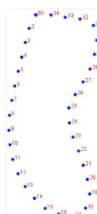

Chaetocnema psylloides.jpg

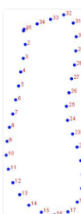

Chaetocnema pusaensis.jpg

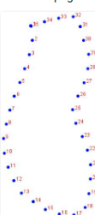

Chaetocnema reteimpunctata.jpg

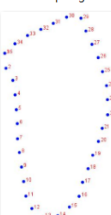

Chaetocnema rufofemorata.jpg

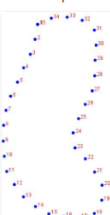

Chaetocnema sahlbergii.jpg

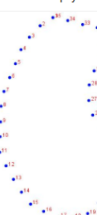

Chaetocnema splendens.jpg

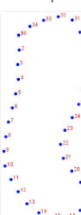

Chaetocnema subcoerulea.jpg

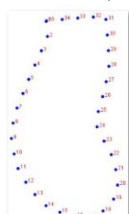

Chaetocnema sulcicollis.jpg

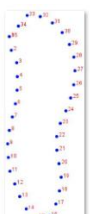

Chaetocnema tarsalis.jpg

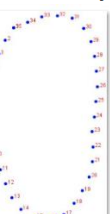

Chaetocnema ussuriensis.jpg

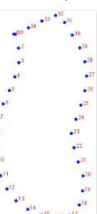

Chaetocnema zangana.jpg

## Outlines of the spermathecal pump of the subgenus *Chaetocnema*

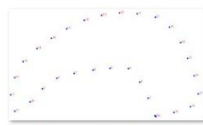

*Chaetocnema baoshanica*.jpg

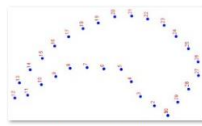

*Chaetocnema basalis*.jpg

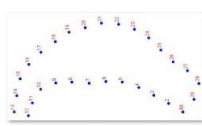

*Chaetocnema breviscula*.jpg

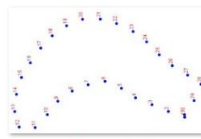

*Chaetocnema chenii*.jpg

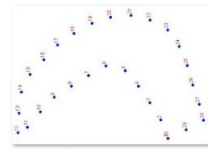

*Chaetocnema chlorophana*.jpg

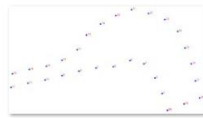

*Chaetocnema compressa*.jpg

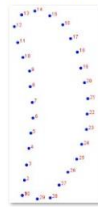

*Chaetocnema concinna*.jpg

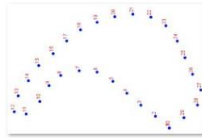

*Chaetocnema conducta*.jpg

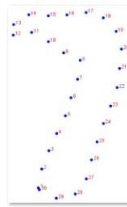

*Chaetocnema confinis*.jpg

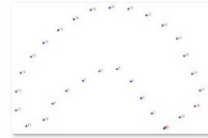

*Chaetocnema constricta*.jpg

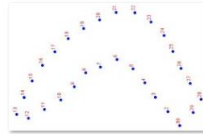

*Chaetocnema coyei*.jpg

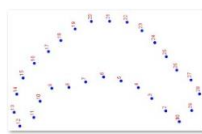

*Chaetocnema delarouzei*.jpg

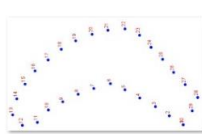

*Chaetocnema depressa*.jpg

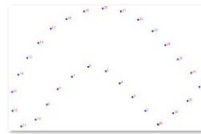

*Chaetocnema deqinensis*.jpg

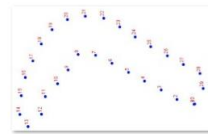

*Chaetocnema dipitana*.jpg

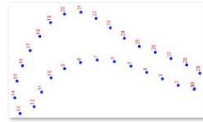

*Chaetocnema duvivieri*.jpg

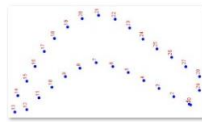

*Chaetocnema excavata*.jpg

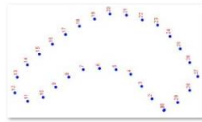

*Chaetocnema fortcostata*.jpg

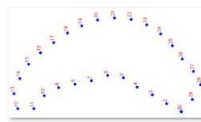

*Chaetocnema fusiformis*.jpg

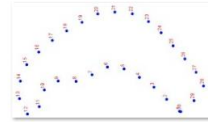

*Chaetocnema gracilis*.jpg

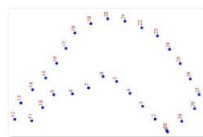

*Chaetocnema granulicollis*.jpg

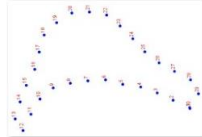

*Chaetocnema hainanensis*.jpg

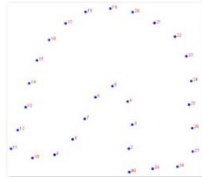

*Chaetocnema heptapotamica*.jpg

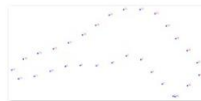

*Chaetocnema jinxiuensis* n.sp..jpg

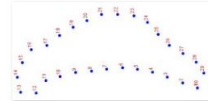

*Chaetocnema kanmiyai*.jpg

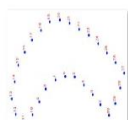

Chaetocnema kimotoi.jpg

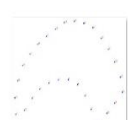

Chaetocnema kingpinensis.jpg

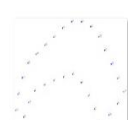

Chaetocnema koreana.jpg

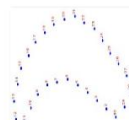

Chaetocnema lubischevi.jpg

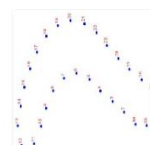

Chaetocnema major.jpg

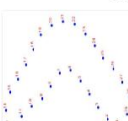

Chaetocnema mandschurica.jpg

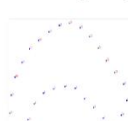

Chaetocnema nebulosa.jpg

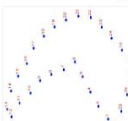

Chaetocnema nigrica.jpg

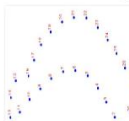

Chaetocnema nigrilatus.jpg

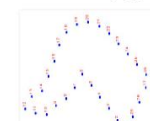

Chaetocnema orientalis.jpg

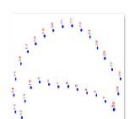

Chaetocnema parafusiformis.jpg

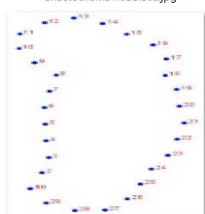

Chaetocnema pelagica.jpg

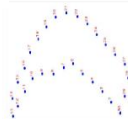

Chaetocnema pericampylaj.jpg

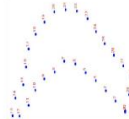

Chaetocnema philippina.jpg

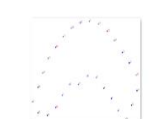

Chaetocnema picipes.jpg

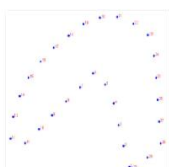

Chaetocnema puncticollis.jpg

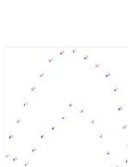

Chaetocnema punctifrons.jpg

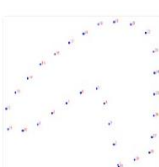

Chaetocnema purpurea.jpg

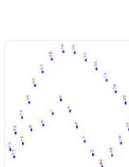

Chaetocnema resplendens.jpg

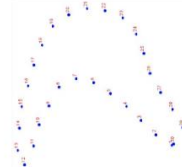

Chaetocnema sabahensis.jpg

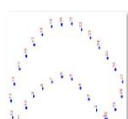

Chaetocnema salixis.jpg

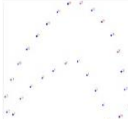

Chaetocnema scheffleri.jpg

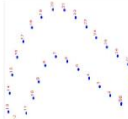

Chaetocnema schlaeflii.jpg

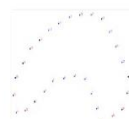

Chaetocnema semicoerulea.jpg

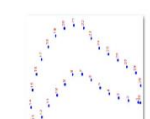

Chaetocnema simplicifrons.jpg

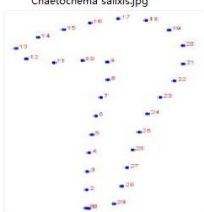

Chaetocnema stictaj.jpg

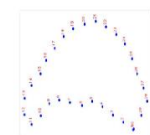

Chaetocnema tibialis.jpg

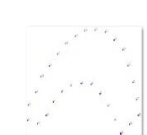

Chaetocnema transbaicalica.jpg

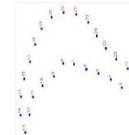

Chaetocnema tristis.jpg

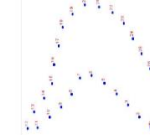

Chaetocnema wallacei.jpg

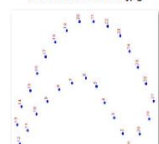

Chaetocnema warchalowskii.jpg

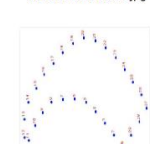

Chaetocnema yaosanica.jpg

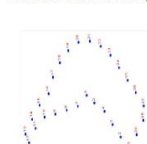

Chaetocnema yiei.jpg

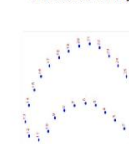

Chaetocnema yulongensis.jpg

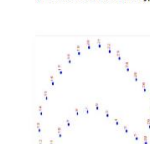

Chaetocnema yunnanica.jpg

## Outlines of the spermathecal pump of the subgenus *Udorpes*

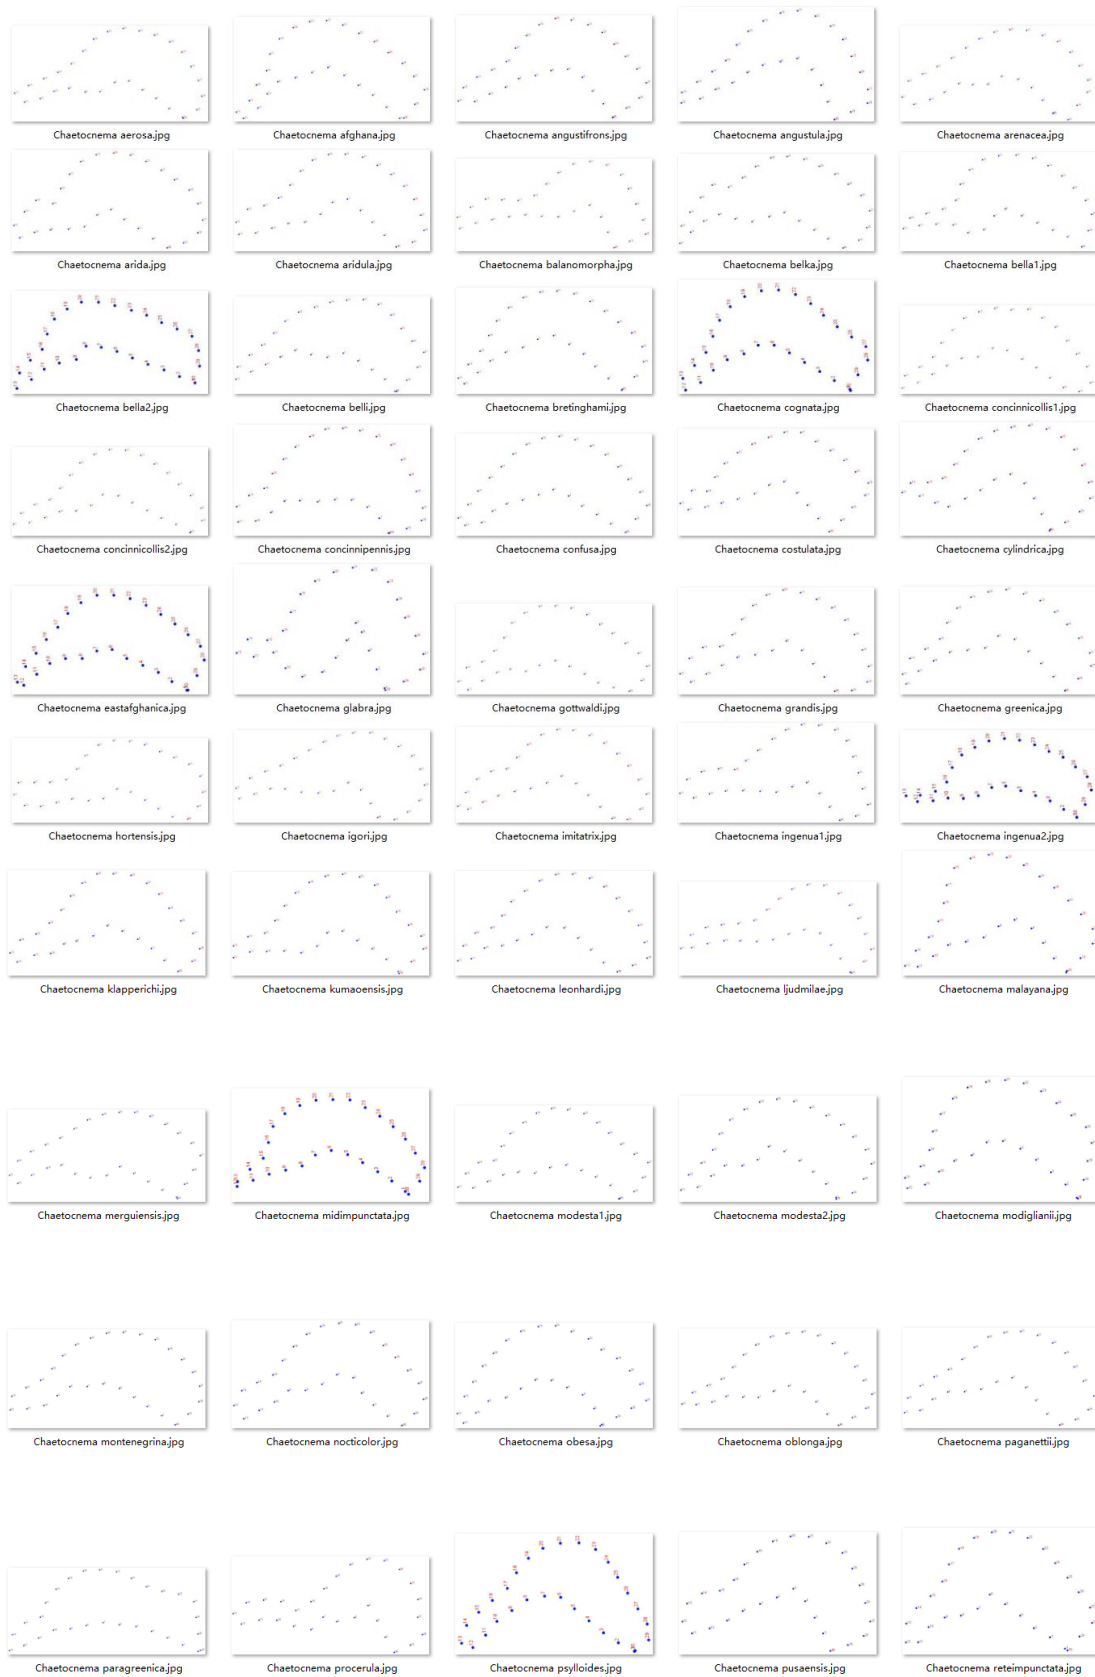

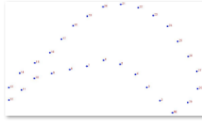

Chaetocnema rufemorata.jpg

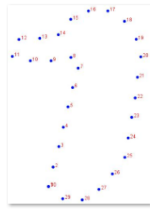

Chaetocnema sahlbergii.jpg

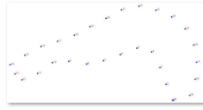

Chaetocnema splendens.jpg

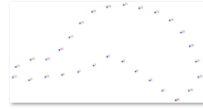

Chaetocnema subcoerulea.jpg

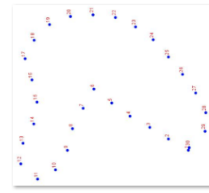

Chaetocnema sulcicollis.jpg

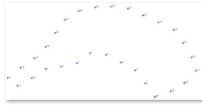

Chaetocnema tarsalis.jpg

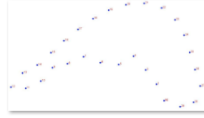

Chaetocnema ussuriensis.jpg

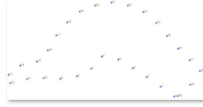

Chaetocnema zangana.jpg

## Curves of head of subgenus *Chaetocnema*

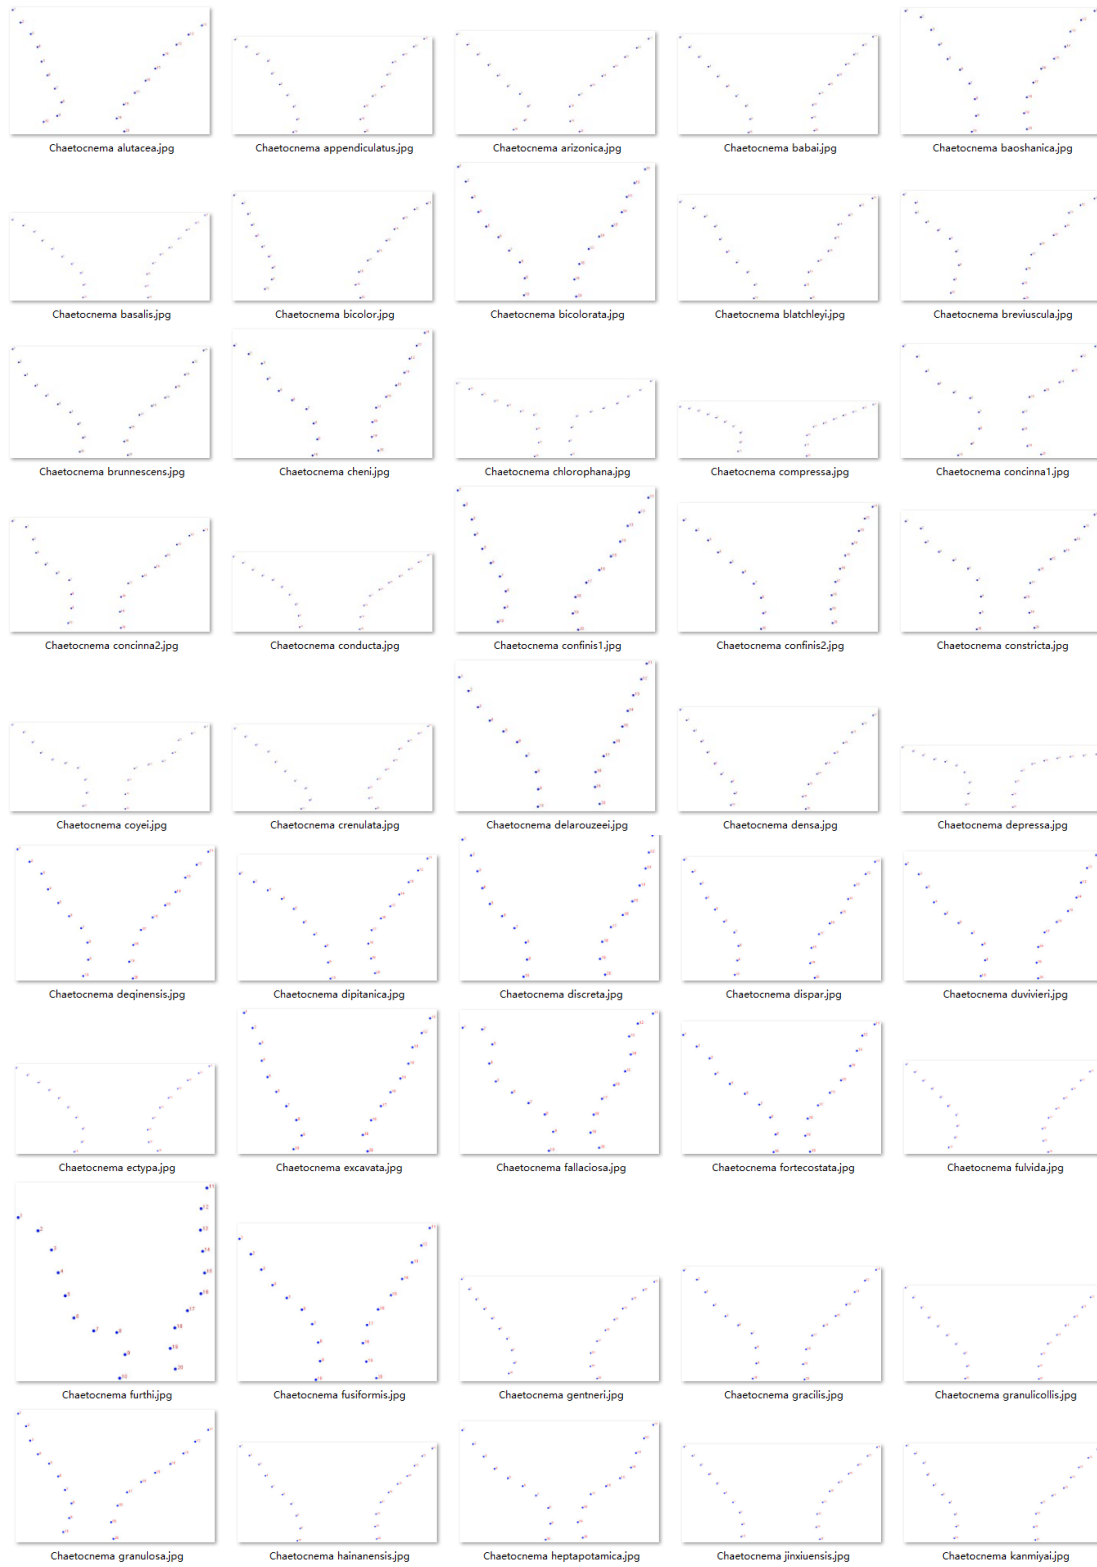

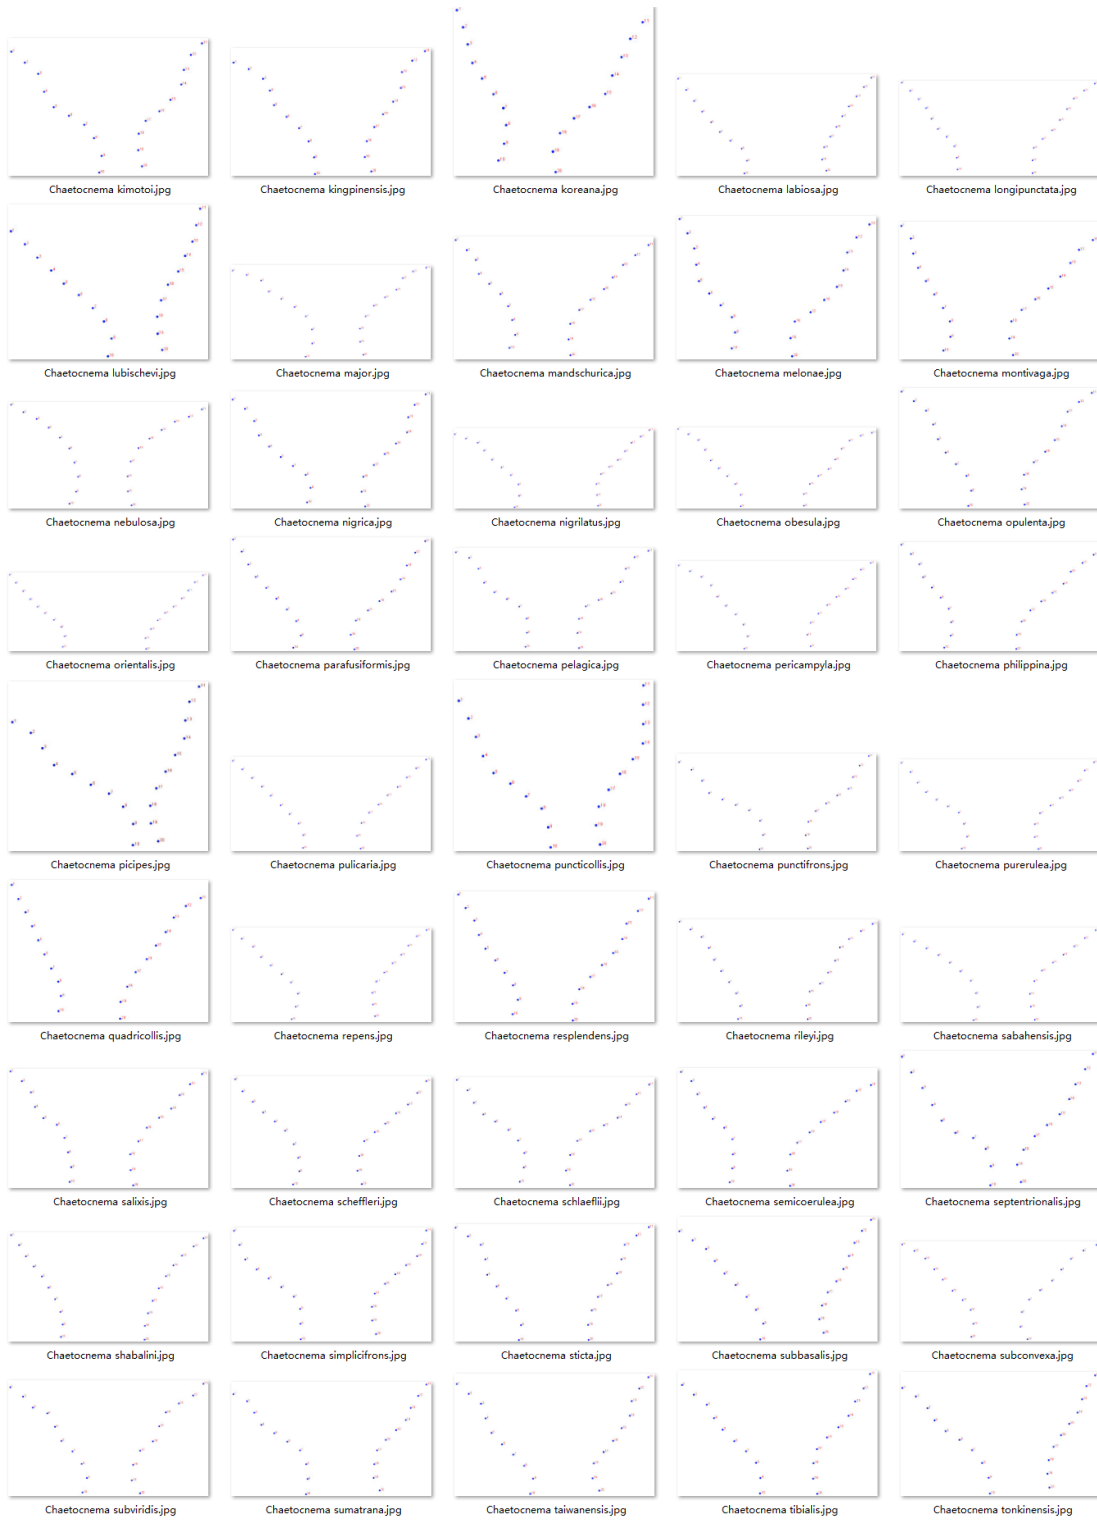

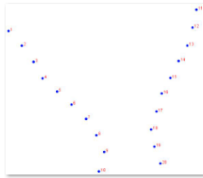

Chaetocnema transbaicalica.jpg

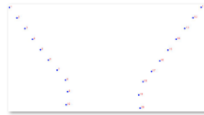

Chaetocnema trapezoidus.jpg

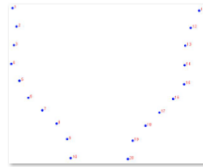

Chaetocnema tristis.jpg

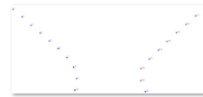

Chaetocnema vesca.jpg

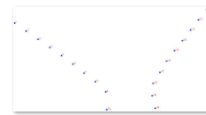

Chaetocnema wallacei.jpg

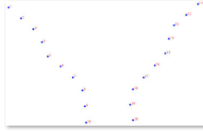

Chaetocnema warchalowskii.jpg

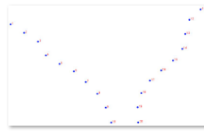

Chaetocnema yaosanica.jpg

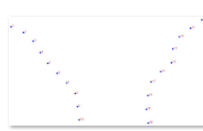

Chaetocnema yiei.jpg

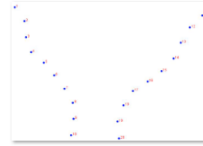

Chaetocnema yulongensis.jpg

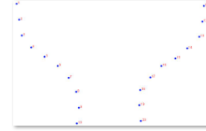

Chaetocnema yunnanica.jpg

## Curves of head of subgenus *Udorpes*

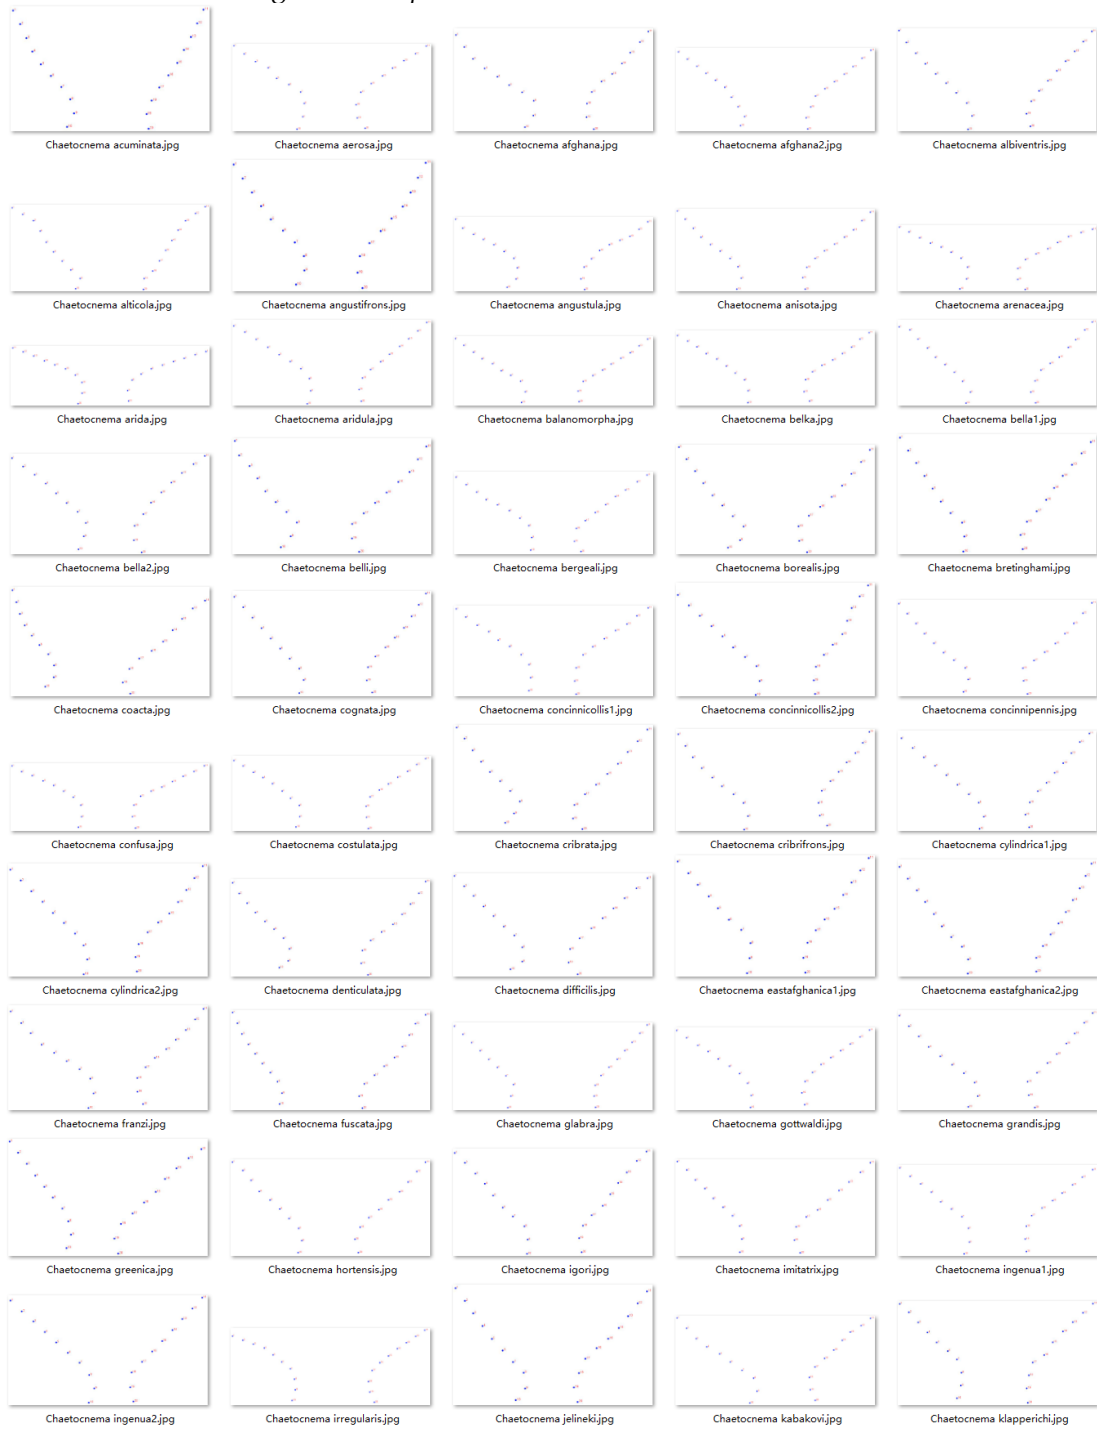

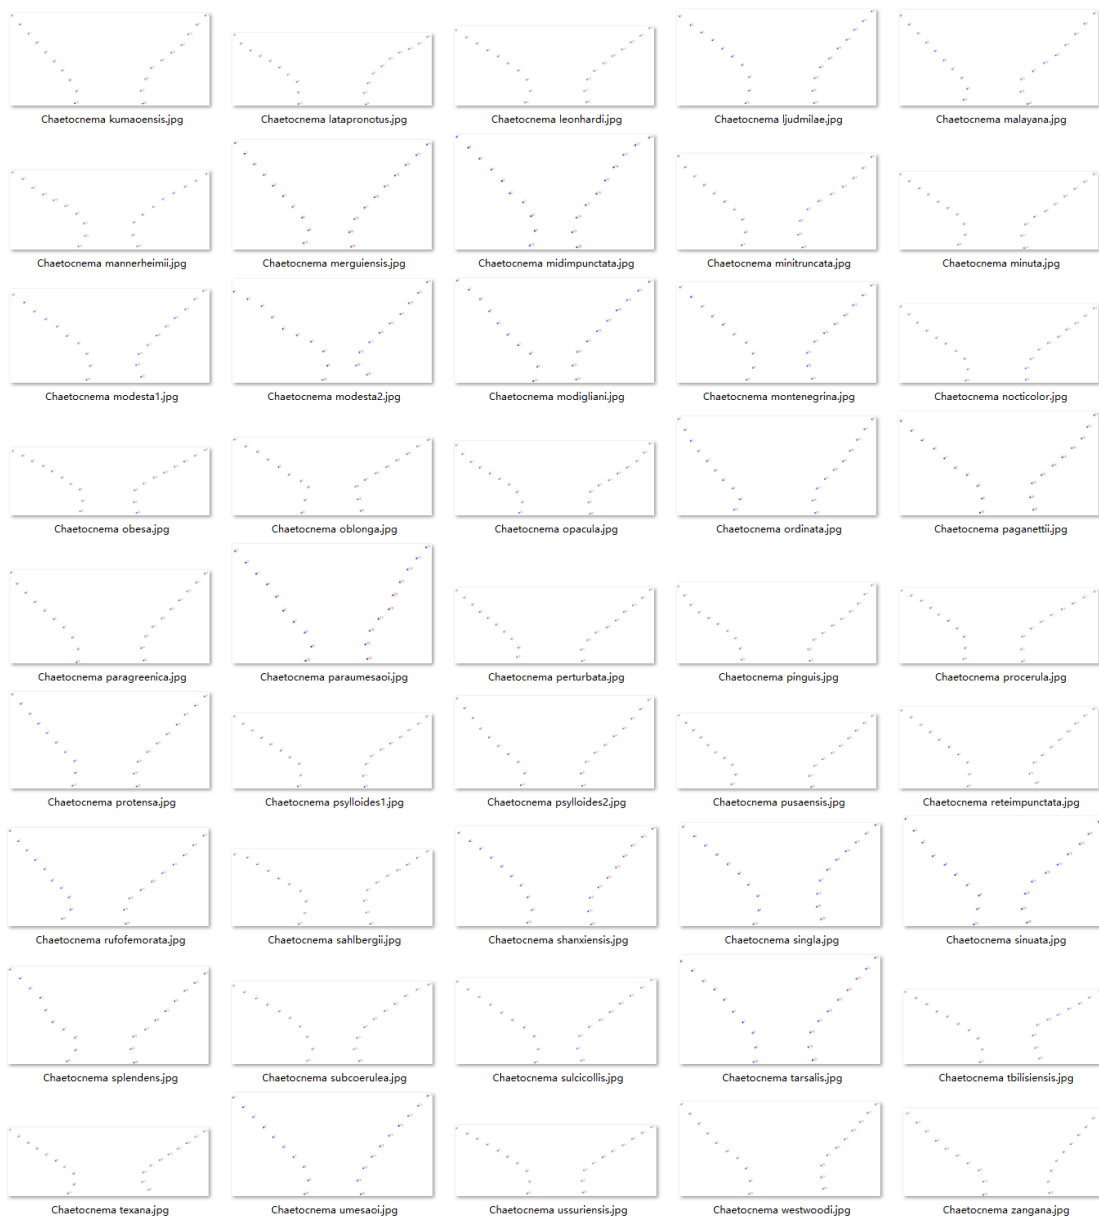

Supplement: s1 [file s1 › 0 Supplementary File S2.pdf]
