# Supplementary material
Source: MDPI journal article supplement (https://www.mdpi.com/1424-2818/15/8/918)
Supplement: s1 [file s1 › 0 Supplementary File S1.pdf]

**Table S1.** List of species in geometric morphometric analysis.

Note. OR: Oriental Region; PA: Palearctic Region; NE: Nearctic Region. Specimen used marked with (\*).

|    | Subgenus           | Species                        | spermatheca<br>pump | spermatheca<br>receptacle | aedeagus<br>in lateral<br>view | aedeagus<br>in ventral<br>view | elytra | pronotum | head | biogeographic<br>region |
|----|--------------------|--------------------------------|---------------------|---------------------------|--------------------------------|--------------------------------|--------|----------|------|-------------------------|
| 1  | <i>Udorpes</i>     | <i>Chaetocnema acuminata</i>   |                     |                           | *                              | *                              | *      | *        | *    | NE                      |
| 2  | <i>Udorpes</i>     | <i>Chaetocnema acupunctata</i> |                     |                           | *                              | *                              | *      | *        |      | NE                      |
| 3  | <i>Chaetocnema</i> | <i>Chaetocnema aenigmatica</i> |                     |                           |                                |                                | *      | *        |      | NE                      |
| 4  | <i>Udorpes</i>     | <i>Chaetocnema aequabilis</i>  |                     |                           | *                              | *                              | *      | *        |      | NE                      |
| 5  | <i>Udorpes</i>     | <i>Chaetocnema albiventris</i> |                     |                           | *                              | *                              | *      | *        | *    | NE                      |
| 6  | <i>Chaetocnema</i> | <i>Chaetocnema alutacea</i>    |                     |                           | *                              | *                              | *      | *        | *    | NE                      |
| 7  | <i>Udorpes</i>     | <i>Chaetocnema anisota</i>     |                     |                           | *                              | *                              | *      | *        | *    | NE                      |
| 8  | <i>Chaetocnema</i> | <i>Chaetocnema arizonica</i>   |                     |                           | *                              | *                              | *      | *        | *    | NE                      |
| 9  | <i>Chaetocnema</i> | <i>Chaetocnema bicolor</i>     |                     |                           | *                              | *                              | *      | *        | *    | NE                      |
| 10 | <i>Chaetocnema</i> | <i>Chaetocnema blatchleyi</i>  |                     |                           | *                              | *                              | *      | *        | *    | NE                      |
| 11 | <i>Udorpes</i>     | <i>Chaetocnema borealis</i>    |                     |                           | *                              | *                              | *      | *        | *    | NE                      |
| 12 | <i>Chaetocnema</i> | <i>Chaetocnema brunnescens</i> |                     |                           | *                              | *                              | *      | *        | *    | NE                      |
| 13 | <i>Chaetocnema</i> | <i>Chaetocnema californica</i> |                     |                           | *                              | *                              | *      | *        |      | NE                      |
| 14 | <i>Udorpes</i>     | <i>Chaetocnema coacta</i>      |                     |                           | *                              | *                              | *      | *        | *    | NE                      |
| 15 | <i>Chaetocnema</i> | <i>Chaetocnema concinna</i>    |                     |                           | *                              | *                              | *      | *        | *    | NE                      |
| 16 | <i>Chaetocnema</i> | <i>Chaetocnema confinis</i>    |                     |                           | *                              | *                              | *      | *        | *    | NE                      |
| 17 | <i>Udorpes</i>     | <i>Chaetocnema costata</i>     |                     |                           | *                              | *                              | *      | *        |      | NE                      |
| 18 | <i>Chaetocnema</i> | <i>Chaetocnema crenulata</i>   |                     |                           | *                              | *                              | *      | *        | *    | NE                      |
| 19 | <i>Udorpes</i>     | <i>Chaetocnema cribrata</i>    |                     |                           | *                              | *                              | *      | *        | *    | NE                      |
| 20 | <i>Udorpes</i>     | <i>Chaetocnema cribrifrons</i> |                     |                           | *                              | *                              | *      | *        | *    | NE                      |

|    |                    |                                  |   |   |   |   |   |    |
|----|--------------------|----------------------------------|---|---|---|---|---|----|
| 21 | <i>Chaetocnema</i> | <i>Chaetocnema densa</i>         | * | * | * | * | * | NE |
| 22 | <i>Udorpes</i>     | <i>Chaetocnema denticulata</i>   | * | * | * | * | * | NE |
| 23 | <i>Udorpes</i>     | <i>Chaetocnema difficilis</i>    | * | * | * | * | * | NE |
| 24 | <i>Chaetocnema</i> | <i>Chaetocnema dispar</i>        | * | * | * | * | * | NE |
| 25 | <i>Chaetocnema</i> | <i>Chaetocnema ectypa</i>        | * | * | * | * | * | NE |
| 26 | <i>Chaetocnema</i> | <i>Chaetocnema elongatula</i>    |   |   | * | * |   | NE |
| 27 | <i>Chaetocnema</i> | <i>Chaetocnema extenuata</i>     | * | * | * | * |   | NE |
| 28 | <i>Udorpes</i>     | <i>Chaetocnema floridana</i>     | * | * | * | * |   | NE |
| 29 | <i>Chaetocnema</i> | <i>Chaetocnema fulvida</i>       | * | * | * | * | * | NE |
| 30 | <i>Udorpes</i>     | <i>Chaetocnema fuscata</i>       | * | * | * | * | * | NE |
| 31 | <i>Chaetocnema</i> | <i>Chaetocnema gentneri</i>      | * | * | * | * | * | NE |
| 32 | <i>Udorpes</i>     | <i>Chaetocnema irregularis</i>   | * | * | * | * | * | NE |
| 33 | <i>Chaetocnema</i> | <i>Chaetocnema labiosa</i>       | * | * | * | * | * | NE |
| 34 | <i>Chaetocnema</i> | <i>Chaetocnema livida</i>        | * | * | * | * |   | NE |
| 35 | <i>Chaetocnema</i> | <i>Chaetocnema magnipunctata</i> | * | * | * | * |   | NE |
| 36 | <i>Udorpes</i>     | <i>Chaetocnema megachora</i>     | * | * | * | * |   | NE |
| 37 | <i>Udorpes</i>     | <i>Chaetocnema megasticta</i>    | * | * | * | * |   | NE |
| 38 | <i>Udorpes</i>     | <i>Chaetocnema minitruncata</i>  | * | * | * | * | * | NE |
| 39 | <i>Udorpes</i>     | <i>Chaetocnema minuta</i>        | * | * | * | * | * | NE |
| 40 | <i>Chaetocnema</i> | <i>Chaetocnema obesula</i>       | * | * | * | * | * | NE |
| 41 | <i>Udorpes</i>     | <i>Chaetocnema oblitterata</i>   | * | * | * | * |   | NE |
| 42 | <i>Udorpes</i>     | <i>Chaetocnema opacula</i>       | * | * | * | * | * | NE |
| 43 | <i>Chaetocnema</i> | <i>Chaetocnema opulenta</i>      | * | * | * | * | * | NE |
| 44 | <i>Udorpes</i>     | <i>Chaetocnema ordinata</i>      | * | * | * | * | * | NE |
| 45 | <i>Udorpes</i>     | <i>Chaetocnema perturbata</i>    | * | * | * | * | * | NE |
| 46 | <i>Udorpes</i>     | <i>Chaetocnema pinguis</i>       | * | * | * | * | * | NE |

|    |                    |                                  |   |   |   |   |   |   |   |    |
|----|--------------------|----------------------------------|---|---|---|---|---|---|---|----|
| 47 | <i>Udorpes</i>     | <i>Chaetocnema producta</i>      |   |   | * | * | * | * |   | NE |
| 48 | <i>Udorpes</i>     | <i>Chaetocnema prolata</i>       |   |   | * | * | * | * |   | NE |
| 49 | <i>Udorpes</i>     | <i>Chaetocnema protensa</i>      |   |   | * | * | * | * | * | NE |
| 50 | <i>Chaetocnema</i> | <i>Chaetocnema pulicaria</i>     |   |   | * | * | * | * | * | NE |
| 51 | <i>Chaetocnema</i> | <i>Chaetocnema quadricollis</i>  |   |   | * | * | * | * | * | NE |
| 52 | <i>Chaetocnema</i> | <i>Chaetocnema repens</i>        |   |   | * | * | * | * | * | NE |
| 53 | <i>Chaetocnema</i> | <i>Chaetocnema rileyi</i>        |   |   | * | * | * | * | * | NE |
| 54 | <i>Chaetocnema</i> | <i>Chaetocnema serpentina</i>    |   |   | * | * | * | * |   | NE |
| 55 | <i>Chaetocnema</i> | <i>Chaetocnema subconvexa</i>    |   |   |   |   | * | * | * | NE |
| 56 | <i>Chaetocnema</i> | <i>Chaetocnema subviridis</i>    |   |   | * | * | * | * | * | NE |
| 57 | <i>Udorpes</i>     | <i>Chaetocnema texana</i>        |   |   | * | * | * | * | * | NE |
| 58 | <i>Udorpes</i>     | <i>Chaetocnema truncata</i>      |   |   | * | * | * | * |   | NE |
| 59 | <i>Chaetocnema</i> | <i>Chaetocnema vesca</i>         |   |   | * | * | * | * | * | NE |
| 60 | <i>Chaetocnema</i> | <i>Chaetocnema appendiculata</i> |   |   | * | * | * | * | * | OR |
| 61 | <i>Chaetocnema</i> | <i>Chaetocnema babai</i>         |   |   |   |   | * | * | * | OR |
| 62 | <i>Chaetocnema</i> | <i>Chaetocnema baoshanica</i>    | * | * | * | * | * | * | * | OR |
| 63 | <i>Chaetocnema</i> | <i>Chaetocnema cheni</i>         | * | * | * | * | * | * | * | OR |
| 64 | <i>Chaetocnema</i> | <i>Chaetocnema confinis</i>      | * | * | * | * | * | * | * | OR |
| 65 | <i>Chaetocnema</i> | <i>Chaetocnema constricta</i>    | * | * | * | * | * | * | * | OR |
| 66 | <i>Chaetocnema</i> | <i>Chaetocnema dapitanica</i>    | * | * | * | * | * | * | * | OR |
| 67 | <i>Chaetocnema</i> | <i>Chaetocnema deqinensis</i>    | * | * | * | * | * | * | * | OR |
| 68 | <i>Chaetocnema</i> | <i>Chaetocnema duvivieri</i>     | * | * | * | * | * | * | * | OR |
| 69 | <i>Chaetocnema</i> | <i>Chaetocnema excavata</i>      | * | * | * | * | * | * | * | OR |
| 70 | <i>Chaetocnema</i> | <i>Chaetocnema fallaciosa</i>    |   |   | * | * | * | * | * | OR |
| 71 | <i>Chaetocnema</i> | <i>Chaetocnema fortecostata</i>  | * | * | * | * | * | * | * | OR |
| 72 | <i>Chaetocnema</i> | <i>Chaetocnema furthi</i>        |   |   | * | * | * | * | * | OR |

|    |                    |                                   |   |   |   |   |   |   |   |    |
|----|--------------------|-----------------------------------|---|---|---|---|---|---|---|----|
| 73 | <i>Chaetocnema</i> | <i>Chaetocnema fusiformis</i>     | * | * | * | * | * | * | * | OR |
| 74 | <i>Chaetocnema</i> | <i>Chaetocnema gracilis</i>       | * | * | * | * | * | * | * | OR |
| 75 | <i>Chaetocnema</i> | <i>Chaetocnema granulicollis</i>  | * | * | * | * | * | * | * | OR |
| 76 | <i>Chaetocnema</i> | <i>Chaetocnema granulosa</i>      |   |   | * | * |   |   |   | OR |
| 77 | <i>Chaetocnema</i> | <i>Chaetocnema hainanensis</i>    | * | * | * | * | * | * | * | OR |
| 78 | <i>Chaetocnema</i> | <i>Chaetocnema jinxiuensis</i>    | * | * | * | * | * | * | * | OR |
| 79 | <i>Chaetocnema</i> | <i>Chaetocnema kingpinensis</i>   | * | * | * | * | * | * | * | OR |
| 80 | <i>Chaetocnema</i> | <i>Chaetocnema longipunctata</i>  |   |   |   |   | * | * | * | OR |
| 81 | <i>Chaetocnema</i> | <i>Chaetocnema melonae</i>        |   |   | * | * | * | * | * | OR |
| 82 | <i>Chaetocnema</i> | <i>Chaetocnema montivaga</i>      |   |   | * | * | * | * | * | OR |
| 83 | <i>Chaetocnema</i> | <i>Chaetocnema nigrica</i>        | * | * | * | * | * | * | * | OR |
| 84 | <i>Chaetocnema</i> | <i>Chaetocnema nigrilata</i>      | * | * | * | * | * | * | * | OR |
| 85 | <i>Chaetocnema</i> | <i>Chaetocnema parafusiformis</i> | * | * | * | * | * | * | * | OR |
| 86 | <i>Chaetocnema</i> | <i>Chaetocnema hongkongensis</i>  | * | * | * | * | * | * | * | OR |
| 87 | <i>Chaetocnema</i> | <i>Chaetocnema philippina</i>     | * | * | * | * | * | * | * | OR |
| 88 | <i>Chaetocnema</i> | <i>Chaetocnema puncticollis</i>   | * | * | * | * | * | * | * | OR |
| 89 | <i>Chaetocnema</i> | <i>Chaetocnema purerulea</i>      | * | * |   |   | * | * | * | OR |
| 90 | <i>Chaetocnema</i> | <i>Chaetocnema resplendens</i>    | * | * | * | * | * | * | * | OR |
| 91 | <i>Chaetocnema</i> | <i>Chaetocnema sabahensis</i>     | * | * | * | * | * | * | * | OR |
| 92 | <i>Chaetocnema</i> | <i>Chaetocnema salixis</i>        | * | * | * | * | * | * | * | OR |
| 93 | <i>Chaetocnema</i> | <i>Chaetocnema simplicifrons</i>  | * | * | * | * | * | * | * | OR |
| 94 | <i>Chaetocnema</i> | <i>Chaetocnema sticta</i>         | * | * | * | * | * | * | * | OR |
| 95 | <i>Chaetocnema</i> | <i>Chaetocnema subbasalis</i>     |   |   | * | * | * | * | * | OR |
| 96 | <i>Chaetocnema</i> | <i>Chaetocnema sumatrana</i>      |   |   | * | * | * | * | * | OR |
| 97 | <i>Chaetocnema</i> | <i>Chaetocnema taiwanensis</i>    |   |   |   |   | * | * | * | OR |
| 98 | <i>Chaetocnema</i> | <i>Chaetocnema tonkinensis</i>    |   |   | * | * | * | * | * | OR |

|     |                    |                                   |   |   |   |   |   |   |   |    |
|-----|--------------------|-----------------------------------|---|---|---|---|---|---|---|----|
| 99  | <i>Chaetocnema</i> | <i>Chaetocnema trapezoidus</i>    |   |   | * | * | * | * | * | OR |
| 100 | <i>Chaetocnema</i> | <i>Chaetocnema tristis</i>        | * | * | * | * | * | * | * | OR |
| 101 | <i>Chaetocnema</i> | <i>Chaetocnema wallacei</i>       | * | * | * | * | * | * | * | OR |
| 102 | <i>Chaetocnema</i> | <i>Chaetocnema warchalowskii</i>  | * | * | * | * | * | * | * | OR |
| 103 | <i>Chaetocnema</i> | <i>Chaetocnema yaosanica</i>      | * | * | * | * | * | * | * | OR |
| 104 | <i>Chaetocnema</i> | <i>Chaetocnema yiei</i>           | * | * | * | * | * | * | * | OR |
| 105 | <i>Chaetocnema</i> | <i>Chaetocnema yulongensis</i>    | * | * | * | * | * | * | * | OR |
| 106 | <i>Chaetocnema</i> | <i>Chaetocnema yunnanica</i>      | * | * | * | * | * | * | * | OR |
| 107 | <i>Udorpes</i>     | <i>Chaetocnema afghana</i>        | * | * | * | * | * | * | * | OR |
| 108 | <i>Udorpes</i>     | <i>Chaetocnema alticola</i>       |   |   | * | * | * | * | * | OR |
| 109 | <i>Udorpes</i>     | <i>Chaetocnema angustifrons</i>   | * | * | * | * | * | * | * | OR |
| 110 | <i>Udorpes</i>     | <i>Chaetocnema bella</i>          | * | * | * | * | * | * | * | OR |
| 111 | <i>Udorpes</i>     | <i>Chaetocnema belli</i>          | * | * | * | * | * | * | * | OR |
| 112 | <i>Udorpes</i>     | <i>Chaetocnema bretinghami</i>    | * | * | * | * | * | * | * | OR |
| 113 | <i>Udorpes</i>     | <i>Chaetocnema cognata</i>        | * | * | * | * | * | * | * | OR |
| 114 | <i>Udorpes</i>     | <i>Chaetocnema concinnicollis</i> | * | * | * | * | * | * | * | OR |
| 115 | <i>Udorpes</i>     | <i>Chaetocnema concinnipennis</i> | * | * | * | * | * | * | * | OR |
| 116 | <i>Udorpes</i>     | <i>Chaetocnema cylindrica</i>     | * | * | * | * | * | * | * | OR |
| 117 | <i>Udorpes</i>     | <i>Chaetocnema eastafghanica</i>  | * | * | * | * | * | * | * | OR |
| 118 | <i>Udorpes</i>     | <i>Chaetocnema glabra</i>         | * | * | * | * | * | * | * | OR |
| 119 | <i>Udorpes</i>     | <i>Chaetocnema greenica</i>       | * | * |   |   | * | * | * | OR |
| 120 | <i>Udorpes</i>     | <i>Chaetocnema ingenua</i>        | * | * | * | * | * | * | * | OR |
| 121 | <i>Udorpes</i>     | <i>Chaetocnema kumaoensis</i>     | * | * | * | * | * | * | * | OR |
| 122 | <i>Udorpes</i>     | <i>Chaetocnema latapronotus</i>   |   |   | * | * | * | * | * | OR |
| 123 | <i>Udorpes</i>     | <i>Chaetocnema malayana</i>       | * | * | * | * | * | * | * | OR |
| 124 | <i>Udorpes</i>     | <i>Chaetocnema merguiensis</i>    | * | * | * | * | * | * | * | OR |

|     |             |                                   |   |   |   |   |   |   |   |    |
|-----|-------------|-----------------------------------|---|---|---|---|---|---|---|----|
| 125 | Udorpes     | <i>Chaetocnema midimpunctata</i>  | * | * | * | * | * | * | * | OR |
| 126 | Udorpes     | <i>Chaetocnema modesta</i>        | * | * | * | * | * | * | * | OR |
| 127 | Udorpes     | <i>Chaetocnema modiglianii</i>    | * | * | * | * | * | * | * | OR |
| 128 | Udorpes     | <i>Chaetocnema paragreenica</i>   | * | * | * | * | * | * | * | OR |
| 129 | Udorpes     | <i>Chaetocnema paraumesaoi</i>    |   |   | * | * | * | * | * | OR |
| 130 | Udorpes     | <i>Chaetocnema psylloides</i>     |   |   | * | * | * | * | * | OR |
| 131 | Udorpes     | <i>Chaetocnema pusaensis</i>      | * | * | * | * | * | * | * | OR |
| 132 | Udorpes     | <i>Chaetocnema reteimpunctata</i> | * | * |   |   | * | * | * | OR |
| 133 | Udorpes     | <i>Chaetocnema shanxiensis</i>    |   |   | * | * | * | * | * | OR |
| 134 | Udorpes     | <i>Chaetocnema singala</i>        |   |   |   |   | * | * | * | OR |
| 135 | Udorpes     | <i>Chaetocnema sulcicollis</i>    | * | * |   |   | * | * | * | OR |
| 136 | Udorpes     | <i>Chaetocnema umesaoi</i>        |   |   | * | * | * | * | * | OR |
| 137 | Udorpes     | <i>Chaetocnema westwoodi</i>      |   |   | * | * | * | * | * | OR |
| 138 | Udorpes     | <i>Chaetocnema zangana</i>        | * | * |   |   | * | * | * | OR |
| 139 | Udorpes     | <i>Chaetocnema aerosa</i>         | * | * | * | * | * | * | * | PA |
| 140 | Udorpes     | <i>Chaetocnema afghana</i>        |   |   | * | * | * | * | * | PA |
| 141 | Udorpes     | <i>Chaetocnema angustula</i>      | * | * | * | * | * | * | * | PA |
| 142 | Udorpes     | <i>Chaetocnema arenacea</i>       | * | * | * | * | * | * | * | PA |
| 143 | Udorpes     | <i>Chaetocnema arida</i>          | * | * | * | * | * | * | * | PA |
| 144 | Udorpes     | <i>Chaetocnema aridula</i>        | * | * | * | * | * | * | * | PA |
| 145 | Udorpes     | <i>Chaetocnema balanomorpha</i>   | * | * | * | * | * | * | * | PA |
| 146 | Chaetocnema | <i>Chaetocnema basalis</i>        | * | * | * | * | * | * | * | PA |
| 147 | Udorpes     | <i>Chaetocnema belka</i>          | * | * |   |   | * | * | * | PA |
| 148 | Udorpes     | <i>Chaetocnema bella</i>          | * | * | * | * | * | * | * | PA |
| 149 | Udorpes     | <i>Chaetocnema bergeali</i>       |   |   | * | * | * | * | * | PA |
| 150 | Chaetocnema | <i>Chaetocnema bicolorata</i>     |   |   | * | * | * | * | * | PA |

|     |                    |                                   |   |   |   |   |   |   |   |    |
|-----|--------------------|-----------------------------------|---|---|---|---|---|---|---|----|
| 151 | <i>Chaetocnema</i> | <i>Chaetocnema breviscula</i>     | * | * | * | * | * | * | * | PA |
| 152 | <i>Chaetocnema</i> | <i>Chaetocnema chlorophana</i>    | * | * | * | * | * | * | * | PA |
| 153 | <i>Chaetocnema</i> | <i>Chaetocnema compressa</i>      | * | * | * | * | * | * | * | PA |
| 154 | <i>Chaetocnema</i> | <i>Chaetocnema concinna</i>       | * | * | * | * | * | * | * | PA |
| 155 | <i>Udorpes</i>     | <i>Chaetocnema concinnicollis</i> | * | * | * | * | * | * | * | PA |
| 156 | <i>Chaetocnema</i> | <i>Chaetocnema conducta</i>       | * | * | * | * | * | * | * | PA |
| 157 | <i>Udorpes</i>     | <i>Chaetocnema confusa</i>        | * | * | * | * | * | * | * | PA |
| 158 | <i>Udorpes</i>     | <i>Chaetocnema costulata</i>      | * | * | * | * | * | * | * | PA |
| 159 | <i>Chaetocnema</i> | <i>Chaetocnema coyei</i>          | * | * | * | * | * | * | * | PA |
| 160 | <i>Udorpes</i>     | <i>Chaetocnema cylindrica</i>     |   |   | * | * | * | * | * | PA |
| 161 | <i>Chaetocnema</i> | <i>Chaetocnema delarouzei</i>     | * | * | * | * | * | * | * | PA |
| 162 | <i>Chaetocnema</i> | <i>Chaetocnema depressa</i>       | * | * | * | * | * | * | * | PA |
| 163 | <i>Chaetocnema</i> | <i>Chaetocnema discreta</i>       |   |   | * | * | * | * | * | PA |
| 164 | <i>Udorpes</i>     | <i>Chaetocnema eastafghanica</i>  |   |   | * | * | * | * | * | PA |
| 165 | <i>Udorpes</i>     | <i>Chaetocnema franzi</i>         |   |   | * | * | * | * | * | PA |
| 166 | <i>Udorpes</i>     | <i>Chaetocnema gottwaldi</i>      | * | * | * | * | * | * | * | PA |
| 167 | <i>Udorpes</i>     | <i>Chaetocnema grandis</i>        | * | * | * | * | * | * | * | PA |
| 168 | <i>Chaetocnema</i> | <i>Chaetocnema granulosa</i>      |   |   | * | * | * | * | * | PA |
| 169 | <i>Chaetocnema</i> | <i>Chaetocnema heptapotamica</i>  | * | * | * | * | * | * | * | PA |
| 170 | <i>Udorpes</i>     | <i>Chaetocnema hortensis</i>      | * | * | * | * | * | * | * | PA |
| 171 | <i>Udorpes</i>     | <i>Chaetocnema igori</i>          | * | * | * | * | * | * | * | PA |
| 172 | <i>Udorpes</i>     | <i>Chaetocnema imitatrix</i>      | * | * | * | * | * | * | * | PA |
| 173 | <i>Udorpes</i>     | <i>Chaetocnema ingenua</i>        | * | * | * | * | * | * | * | PA |
| 174 | <i>Udorpes</i>     | <i>Chaetocnema jelineki</i>       |   |   | * | * | * | * | * | PA |
| 175 | <i>Udorpes</i>     | <i>Chaetocnema kabakovi</i>       |   |   | * | * | * | * | * | PA |
| 176 | <i>Chaetocnema</i> | <i>Chaetocnema kanmiyai</i>       | * | * |   |   | * | * | * | PA |

|     |                    |                                 |   |   |   |   |   |   |   |    |
|-----|--------------------|---------------------------------|---|---|---|---|---|---|---|----|
| 177 | <i>Chaetocnema</i> | <i>Chaetocnema kimotoi</i>      | * | * | * | * | * | * | * | PA |
| 178 | <i>Udorpes</i>     | <i>Chaetocnema klapperichi</i>  | * | * | * | * | * | * | * | PA |
| 179 | <i>Chaetocnema</i> | <i>Chaetocnema koreana</i>      | * | * | * | * | * | * | * | PA |
| 180 | <i>Udorpes</i>     | <i>Chaetocnema leonhardi</i>    | * | * | * | * | * | * | * | PA |
| 181 | <i>Udorpes</i>     | <i>Chaetocnema ljudmilae</i>    | * | * | * | * | * | * | * | PA |
| 182 | <i>Chaetocnema</i> | <i>Chaetocnema lubischevi</i>   | * | * | * | * | * | * | * | PA |
| 183 | <i>Chaetocnema</i> | <i>Chaetocnema major</i>        | * | * | * | * | * | * | * | PA |
| 184 | <i>Chaetocnema</i> | <i>Chaetocnema mandschurica</i> | * | * | * | * | * | * | * | PA |
| 185 | <i>Udorpes</i>     | <i>Chaetocnema mannerheimii</i> |   | * | * | * | * | * | * | PA |
| 186 | <i>Udorpes</i>     | <i>Chaetocnema modesta</i>      | * | * | * | * | * | * | * | PA |
| 187 | <i>Udorpes</i>     | <i>Chaetocnema montenegrina</i> | * | * | * | * | * | * | * | PA |
| 188 | <i>Chaetocnema</i> | <i>Chaetocnema nebulosa</i>     | * | * | * | * | * | * | * | PA |
| 189 | <i>Udorpes</i>     | <i>Chaetocnema nocticolor</i>   | * | * | * | * | * | * | * | PA |
| 190 | <i>Udorpes</i>     | <i>Chaetocnema obesa</i>        | * | * | * | * | * | * | * | PA |
| 191 | <i>Udorpes</i>     | <i>Chaetocnema oblonga</i>      | * | * | * | * | * | * | * | PA |
| 192 | <i>Chaetocnema</i> | <i>Chaetocnema orientalis</i>   | * | * | * | * | * | * | * | PA |
| 193 | <i>Udorpes</i>     | <i>Chaetocnema paganettii</i>   | * | * | * | * | * | * | * | PA |
| 194 | <i>Chaetocnema</i> | <i>Chaetocnema pelagica</i>     | * | * | * | * | * | * | * | PA |
| 195 | <i>Chaetocnema</i> | <i>Chaetocnema picipes</i>      | * | * | * | * | * | * | * | PA |
| 196 | <i>Udorpes</i>     | <i>Chaetocnema procerula</i>    | * | * | * | * | * | * | * | PA |
| 197 | <i>Udorpes</i>     | <i>Chaetocnema psylloides</i>   | * | * | * | * | * | * | * | PA |
| 198 | <i>Chaetocnema</i> | <i>Chaetocnema punctifrons</i>  | * | * | * | * | * | * | * | PA |
| 199 | <i>Udorpes</i>     | <i>Chaetocnema rufofemorata</i> | * | * | * | * | * | * | * | PA |
| 200 | <i>Udorpes</i>     | <i>Chaetocnema sahlbergii</i>   | * | * | * | * | * | * | * | PA |
| 201 | <i>Chaetocnema</i> | <i>Chaetocnema scheffleri</i>   | * | * | * | * | * | * | * | PA |
| 202 | <i>Chaetocnema</i> | <i>Chaetocnema schlaeflii</i>   | * | * | * | * | * | * | * | PA |



**Table S2.** Morphological diversity (MD) of the seven characters of the genus *Chaetocnema* and two subgenera

| Groups                      | pronotum | elytron | head   | aedeagus in lateral view | aedeagus in ventral view | spermathecal receptacle | spermathecal pump |
|-----------------------------|----------|---------|--------|--------------------------|--------------------------|-------------------------|-------------------|
| subgenus <i>Chaetocnema</i> | 0.0050   | 0.0052  | 0.0133 | 0.0043                   | 0.0014                   | 0.0094                  | 0.0247            |
| subgenus <i>Udorpes</i>     | 0.0049   | 0.0033  | 0.0075 | 0.0039                   | 0.0014                   | 0.0198                  | 0.0180            |
| genus <i>Chaetocnema</i>    | 0.0055   | 0.0042  | 0.0123 | 0.0053                   | 0.0020                   | 0.0221                  | 0.0228            |

**Table S3.** Morphological diversity (MD) of the seven characters of Oriental, Palearctic and Nearctic *Chaetocnema*

| Groups                        | pronotum | elytron | head   | aedeagus in lateral view | aedeagus in ventral view | spermathecal receptacle | spermathecal pump |
|-------------------------------|----------|---------|--------|--------------------------|--------------------------|-------------------------|-------------------|
| Oriental <i>Chaetocnema</i>   | 0.0033   | 0.0027  | 0.0106 | 0.0040                   | 0.0018                   | 0.0188                  | 0.0243            |
| Palearctic <i>Chaetocnema</i> | 0.0030   | 0.0047  | 0.0133 | 0.0063                   | 0.0020                   | 0.0254                  | 0.0201            |
| Nearctic <i>Chaetocnema</i>   | 0.0045   | 0.0023  | 0.0091 | 0.0043                   | 0.0016                   | -                       | -                 |

**Table S4.** Mahalanobis distances and Procrustes distances for seven characters among Oriental, Palearctic and Nearctic *Chaetocnema*

|          |                       | pronotum | elytron | head   | aedeagus in lateral view | aedeagus in ventral view | spermathecal receptacle | spermathecal pump |
|----------|-----------------------|----------|---------|--------|--------------------------|--------------------------|-------------------------|-------------------|
| OR vs PA | Mahalanobis distances | 4.6065   | 3.4171  | 1.6906 | 3.1202                   | 3.9602                   | 4.1724                  | 3.0467            |
|          | Procrustes distances  | 0.0573   | 0.0666  | 0.0614 | 0.0414                   | 0.0225                   | 0.0182                  | 0.0613            |
| OR vs NE | Mahalanobis distances | 4.9500   | 3.9936  | 1.8856 | 3.9372                   | 3.7094                   | -                       | -                 |
|          | Procrustes distances  | 0.0592   | 0.0612  | 0.0609 | 0.0173                   | 0.0118                   | -                       | -                 |
| PA vs NE | Mahalanobis distances | 6.2715   | 3.2106  | 2.4045 | 4.9682                   | 3.7330                   | -                       | -                 |
|          | Procrustes distances  | 0.1118   | 0.0104  | 0.0554 | 0.0403                   | 0.0253                   | -                       | -                 |
